# Supplementary material
Source: PubMed Central journal article supplement (PMC3260931)
Supplement: ejhg2011167x1.pdf [file ejhg2011167x1.pdf]

Supplemental Table 1 Allelic Frequencies of SNPs identified in the coding region of *RAII*.

| Ref SNP    | <i>RAII</i> exon | Alleles<br>(ancestral/variation) | A/A   | A/B | B/B   |
|------------|------------------|----------------------------------|-------|-----|-------|
| rs61999281 | 3                | G/A                              | 0.896 |     | 0.103 |
| rs3803763  | 3                | G/C                              | 0.137 |     | 0.655 |
| rs35068024 | 3                | GC/DEL                           | 0.586 |     | 0.413 |
| rs34083643 | 3                | G/del                            | 0.172 |     | 0.482 |
| rs71944489 | 3                | GCA/DEL                          | 0.551 |     | 0.448 |
| rs11649804 | 3                | C/A                              | 0.310 |     | 0.551 |
| rs8067439  | 3                | G/A                              | 0.206 |     | 0.482 |
| rs4925112  | 3                | T/C                              | 0.689 |     | 0.275 |
| rs32686634 | 3                | C/T                              | 0.758 |     | 0.241 |
| rs3818717  | 4                | T/C                              | 0.482 |     | 0.413 |
| c.1143 C>T | 3                | C/T                              | 0.986 |     | 0.013 |

(A – ancestral / B – variation)

Supplemental Table 2 *In silico* predictions of pathogenicity for variants described in this study.

| Database | c.3650G→A (R1217Q)      | c.4166A→G (Q1389R)      |
|----------|-------------------------|-------------------------|
| Panther  | Probably damaging       | Probably damaging       |
| PolyPhen | Predicted to be benign  | Probably damaging       |
| Pmut     | Pathological            | Pathological            |
| SIFT     | Affect Protein Function | Affect Protein Function |
